# Supplementary material for: Fibroblasts profiling in scarring trachoma identifies IL-6 as a functional component of a fibroblast-macrophage pro-fibrotic and pro-inflammatory feedback loop
Source: PubMed Central journal article supplement (PMC4913315; doi:10.1038/srep28261), 2016-06-20
Supplement: srep28261-s1.pdf [file srep28261-s1.pdf]

***Fibroblasts profiling in scarring trachoma identifies IL6 as a functional component of a fibroblast-macrophage pro-fibrotic and pro-inflammatory feedback loop***

***Zanetta-Zoi Kechagia, Daniel G. Ezra, Matthew J. Burton and Maryse Bailly***

## **Supplementary Information**

## **Supplementary Materials and Methods**

### **Biopsy collection and expansion**

Biopsies from cases were collected from adults (age >18 years old) with clearly established Trachomatous Trichiasis with associated scarring of the upper tarsal conjunctiva (Grade 2 or 3 on the detailed WHO FPC Trachoma grading scale), undergoing trichiasis surgery. Patients that had been subjected to previous surgery or had conjunctival scarring from a cause other than trachoma were excluded from the study. Control biopsies were collected from adults without Trachomatous Trichiasis or any clinically apparent conjunctival disease or scarring, which were due to undergo ophthalmic surgery for a condition unrelated to disease of the conjunctiva (eg cataract) and had no previous record of eyelid surgery.

The eyelid was anaesthetized with an injection of 2% lignocaine and the eye cleaned with 5% povidone iodine. A biopsy sample was taken using a 3mm trephine from the tarsal conjunctiva, 2mm from the lid margin, at the junction of the medial and lateral of the everted lid. None of these cases had evidence of current *C. trachomatous* infection as detected by PCR (Amplicor PCR, Roche). The biopsies were either wrapped in sterile gauze and moistened with normal saline or placed in Optimem medium (Life Technologies) and transported to the laboratory at +8°C. Biopsies derived from trachoma and control patients were used for fibroblast expansion, with similar age range and gender for both sets (Table S2). The explants were placed in 32 mm tissue culture plates after being dissected and digested at 37°C for 10-15min using 0.05% Collagenase in PBS. Cells were then cultured in Dulbecco's modified Eagle's medium (DMEM) (PAA laboratories, Austria or Life Technologies) supplemented with 10% (v/v) heat-inactivated foetal bovine serum (FBS, Sigma-Aldrich, UK), 100 IU/ml penicillin, 100 µg/ml streptomycin (hereafter referred to as complete medium) until 40% confluence and then trypsinised and passaged in a T25 tissue culture flask (Corning, NY, USA). Contaminating epithelial and goblet cells were eliminated from the cultures after the first or second passage. Cultures were assessed for typical fibroblast morphology by phase contrast microscopy before every experiment. Cells were then maintained in complete medium and used between passages 2 and 8 for all the experiments. Serum-free medium was used where indicated with or without the addition of cytokines.

### **Collagen Contraction assay**

Control and diseased fibroblasts were embedded in three-dimensional, collagen type I matrix (First Link Ltd., Birmingham, UK) at a final collagen concentration of 1.4 mg/ml after pH was rapidly adjusted to 7 using 1M NaOH. Cells were added to the collagen mixture at a final concentration  $8 \times 10^4$  cells/ml or  $16 \times 10^4$ /ml for FBS-stimulated or serum free contraction assays, respectively. For co-culture experiments, macrophages were added to the gel mix at a final ratio of 1 (fibroblast): 4 (macrophages) ( $8 \times 10^4$  cells/ml :  $3.2 \times 10^5$  cells/ml) and cultured in 10% FBS or SF DMEM medium. The collagen lattices were cast on Mattek® dishes (MatTek Corporation, Ashland, MA) and after 20 min incubation at 37°C gels were detached and medium was added. Reduction in lattice area at days 1, 3, and 7 due to contraction was digitally photographed, and the gel areas calculated using image analysis software (ImageJ, [rsbweb.nih.gov/ij/](http://rsbweb.nih.gov/ij/)).

To determine cell response to cytokines and growth factors, gels were made using SF medium (supplemented with 0.7% bovine serum albumin (BSA) (Sigma-Aldrich, UK) and 100 IU/ml penicillin, 100 µg/ml streptomycin (Gibco, Life Technologies, UK) with the addition of one of the following factors: IL-1β, PDGF-BB, IL-17A (10 ng/ml, R&D Systems, UK), TGF-β1, TNF-α, CTGF or CXCL5 (5 ng/ml, Peprotech, UK), IL-6 (20 ng/ml, R&D Systems, UK). The optimal concentration of cytokines and growth factors was first determined after testing a wider range of concentrations.

### **Collagen gel imaging**

Immunofluorescence was performed as described before (1). Briefly, collagen gels were fixed using 3.7% Formaldehyde (Sigma-Aldrich, UK) followed by a 30-minute incubation in 0.5% Triton-X100 (Sigma) and 0.1 M glycine. The gels were then stained with Rhodamine-phalloidin (Invitrogen, Life Technologies, UK) in Tris Buffer Saline (TBS) additioned with 1% BSA and 1% FBS in TBS at various time points during contraction. The gels were then imaged using a Biorad Radiance confocal microscope (Zeiss Axiovert S100/Biorad Radiance 2000; Zeiss, Cambridge, UK) to visualize the cells (red, Green HeNe laser 540/565 nm) and the matrix (confocal reflection microscopy) using a long working distance objective (ZEISS LD plan-Neofluoar 63x/0.75).

### **Elastic modulus calculation**

The Elastic Modulus (Young's modulus) of the tissue constructs was calculated from the formula:  $Fm = E \times A$ , where  $Fm$  is the matrix force and  $A$  is the cross-sectional area of the gels (2) with  $A = Tissue\ height \times probe\ length$ . Tissue height was evaluated manually using the focus drive function on a software driven (OpenLab, Improvision) Zeiss Axiovert 100M microscope (Zeiss plan-neofluar 10x/0.30). The length of the probe used for the indentations was 5 mm. For each tissue construct, tissue height was averaged from 5 measurements, and 4 gels per experiment and per condition were used to calculate the elastic modulus.

### **Flow cytometry**

Flow cytometry was used to assess integrin expression of 3 Control and 3 trachoma cell lines. Cells were trypsinised, washed with PBS and incubated with FITC conjugated antibodies for 1h on ice. The conjugated antibodies used are listed in Table S1. Cells were acquired on a BD FACSCalibur using CellQuest (BD Cytometry Systems) at the FACS facility in the Institute of Ophthalmology, UCL. Flow cytometry analyses were performed using FlowJo Software (Tree star, OR USA).

### **Macrophage differentiation**

U937 monocytes were cultured in RPMI1640 (Gibco, Life technologies, UK) supplemented with 10% FBS, 100 IU/ml penicillin, and 100  $\mu$ g/ml streptomycin (complete RPMI). For differentiation into macrophages, the cells were incubated with 100 nM PMA for 3 days in complete RPMI, and further rested for 2-3 days in regular complete RPMI.

### **Metabolic activity**

Cell metabolic activity was measured at day 4 of fibroblasts growing in collagen gels. Cells/gels were incubated for 3 hours in 37°C with 10% Alamar blue in 10% FBS DMEM medium. After 3 hours supernatants were examined for fluorescence absorbance, according to manufacture guidelines.

### **MMP activity**

MMP activity released in the medium during gel contraction was measured at day 5 using an MMP activity kit (MMP Activity Assay Kit, Abcam, UK), following manufacturers instructions.

### **Pro-collagen synthesis**

An enzyme immunoassay (TaKara BIO INC.) was used to determine the Pro-collagen Type I C-peptide concentration in conditioned medium of contracting gels. Supernatants from Day 3 and 7 of contraction were collected and kept in -80 °C until used. The supernatants from 8 control and 8 cases were examined for Pro-collagen Type I C-peptide concentration, following manufacturer's protocol for higher sensitivity Samples. The % change in pro-collagen I synthesis was calculated for each cell line.

### **Real time qPCR**

Reverse transcription was carried out from the extracted mRNA using the QuantiTect Reverse Transcription Kit (Qiagen, UK) according to manufacturer's instructions. Gene expression was measured by qRT-PCR using premade primers with FAM™ dye-labeled TaqMan® MGB probe (250 nM final 1X reaction concentration) and *Taq* PCR Master Mix Kit (Qiagen, UK) according to the supplied protocol. The primers had the following assay ID: NM\_002046.3 (GAPDH), Hs99999032\_m1 (IL-6), Hs00189850\_m1 (NCAM2), Hs00261096\_s1 (PCDH7), Hs01029413\_m1 (TFAP2A), Hs00170261\_m1 (THBS4) (Assay-on-Demand; Applied Biosystems, Foster City, CA). qRT-PCR reactions were performed on a real-time PCR system (HT7900 Fast Real-Time PCR; Applied Biosystems). Data were analysed using the comparative  $\Delta$ CT method (3).

### **Western blot**

Western blot was performed as previously described (1). The following antibodies were used in this study: IL-6, Mouse IgG1 (R&D systems); Akt, p-Akt (Ser473) (D9E) XP, Stat3 (124H6), p-Stat3 (Tyr705) (D3A7) XP® (Cell Signalling).

### **References**

1. Tovell VE, Chau CY, Khaw PT, Bailly M (2012) Rac1 inhibition prevents tissue contraction and MMP mediated matrix remodeling in the conjunctiva. *Invest Ophthalmol Vis Sci* 53(8):4682–91.
2. Marquez JP, et al. (2009) High-throughput measurements of hydrogel tissue construct mechanics. *Tissue Eng Part C Methods* 15(2):181–90.
3. Livak KJ, Schmittgen TD (2001) Analysis of relative gene expression data using real-time quantitative PCR and the 2(-Delta Delta C(T)) Method. *Methods* 25(4):402–8.

## Supplementary *Figure Legends*

**Figure S1. Control and trachoma derived cells exhibit a similar morphology in culture.** (A) Shown are 5 representative control and trachoma-derived fibroblast cultures after expansion (passage 5-7). Scale bar, 100  $\mu\text{m}$ . (B-C) Analysis of the expression profile of integrins  $\beta 1$ ,  $\beta 2$ ,  $\beta 4$ ,  $\alpha v$ ,  $\alpha 3$  and  $\alpha 4$  was performed using FACS. CFs and STFs have similar integrin expression levels, both in terms of (B) percentage of positive cells and (C) levels of expression (mean fluorescence intensity, MFI). Both  $\beta 1$  and  $\alpha v$  integrins are highly expressed in CFs and STFs. Graphs show the mean  $\pm$  SEM for 3 STFs and 3 CFs from 2 independent experiments.

**Figure S2. Trachoma fibroblasts display increased matrix degradation during contraction.** Trachoma and control fibroblasts were seeded in collagen matrices for contraction in presence of 10% serum and the gels were fixed and stained with Rhodamine phalloidin at day 1, 3 and 7 of contraction. The gels were then imaged using a confocal microscope and representative z-sections were captured for each time point. F-actin: red, maximum intensity projection; matrix: confocal reflection microscopy, one representative confocal slice (midway through the cell volume). Shown are representative images from (A) one CF (C29) and (B) one STF (F07). Arrows indicate distinct collagen fibres, noticeably more abundant in the gels populated with CFs. Haze denotes partially degraded collagen. Scale bar= 40 $\mu\text{m}$ .

**Figure S3.  $\alpha$ -SMA expression in contracting fibroblasts.** Trachoma and control fibroblasts were seeded in collagen matrices for contraction in presence of 10% serum and the gels were fixed and stained for  $\alpha$ -SMA and F-actin at day 7 of contraction. The gels were then imaged using a confocal microscope to visualize the cells and the percentage of  $\alpha$ -SMA positive cells was determined on 3 CFs (C29, C26, C31) and 3 STFs (F10, F99, F106) cell lines. (A) A representative example of an  $\alpha$ -SMA positive (right) and a negative (left) cells (F-actin, red;  $\alpha$ -SMA, green). Scale bar, 40  $\mu\text{m}$ . (B) Proportion of  $\alpha$ -SMA positive cells at day 7 of contraction in 3D collagen matrices. Shown is the mean  $\pm$  SEM of 3 independent experiments for 3 CFs and 3 STFs.

**Figure S4. (A) Modulation of IL-6 activity or expression.** IL-6 neutralizing antibody (IL-6 nAb) activity cause a dose depended decrease in STAT3 phosphorylation in macrophages. siRNA treatment downregulate IL-6 expression in fibroblasts. (B)

**Macrophages alone do not contract collagen gels.** Macrophages alone cultured in gels in (i) medium containing 10% serum or (ii) in serum-free medium did not contract collagen gels. Shown are macrophage-containing gels after 7 days culture. The outer circle denotes the size of the gels at the start of the experiment. **(C) IL-6 stimulates STAT3 and Akt phosphorylation in macrophages in a dose- and time- dependent manner.** Lysates from macrophages treated with different concentrations of IL-6 (0, 10, 20, 40 ng/ml) in serum free medium indicate a dose response to IL-6 stimulation, as indicated by STAT3 and Akt phosphorylation levels. **(D) CFs and STFs differentially activate Akt phosphorylation in macrophages through an IL-6 dependent manner.** CFs and STFs-derived CM, obtained from fibroblasts treated with non-target control siRNA (NT control) or IL-6 targeting siRNA (IL-6 siRNA), was added to U937 differentiated macrophages. The cells were lysed after 24h incubation and tested for Akt phosphorylation (n=2 for 5 CFs and 5 STFs).



Kechagia et al Supplementary Figure S1

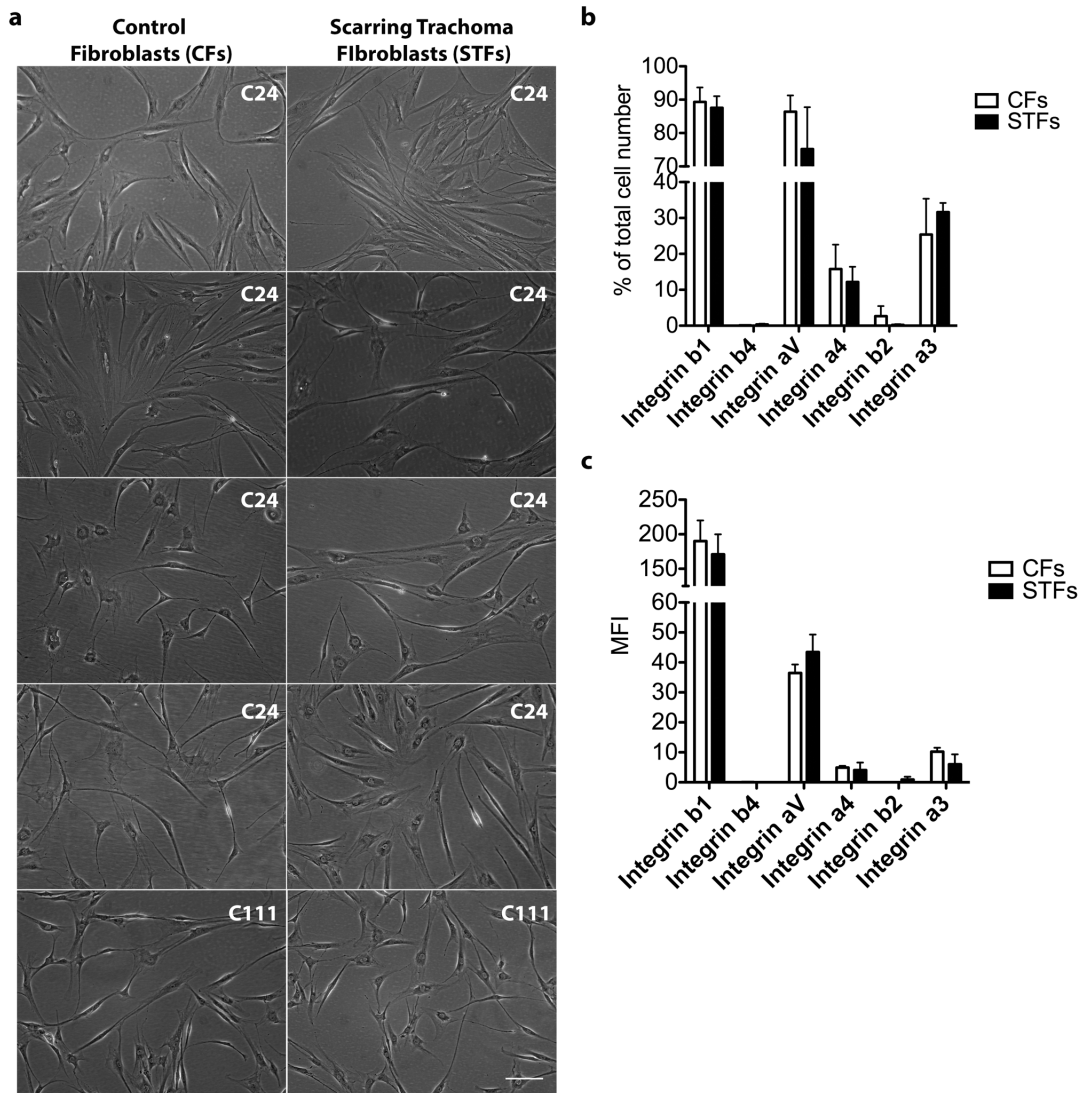

**Kechagia et al Supplementary Figure S2**

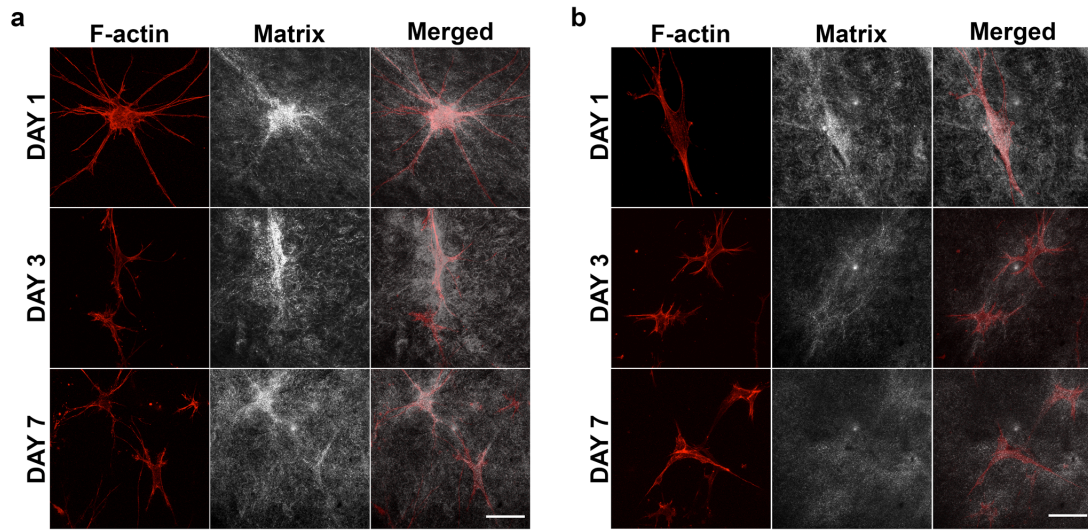

## Kechagia et al Supplementary Figure S3

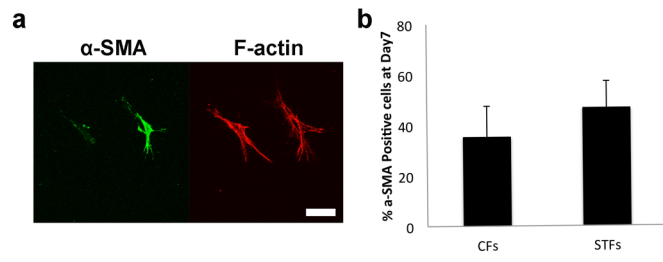

## Kechagia et al Supplementary Figure S4

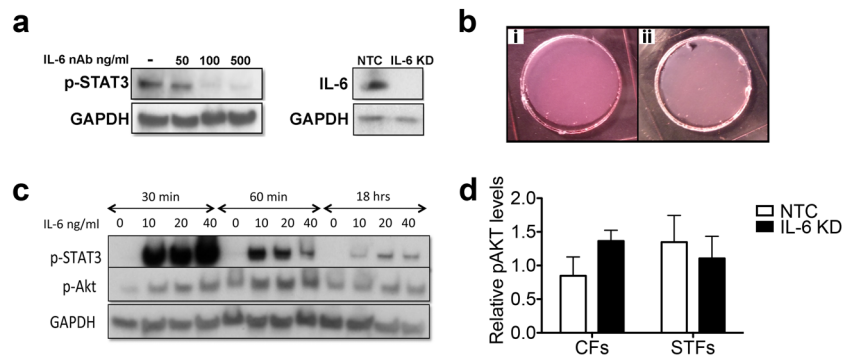

**Table S1** *FACS analysis antibodies*

| <b>Antibodies</b>                                       | <b>Integrin/FC controls</b> | <b>Company</b> |
|---------------------------------------------------------|-----------------------------|----------------|
| Alexa Fluor® 488 Mouse IgG1, $\kappa$ Isotype Ctrl (FC) | FC Control                  | BioLegend, UK  |
| Alexa Fluor® 488 anti-human CD29 Antibody               | Integrin $\beta$ 1          | BioLegend, UK  |
| FITC Mouse IgG2a, $\kappa$ Isotype Ctrl (FC)            | FC Control                  | BioLegend, UK  |
| FITC anti-human CD104 Antibody                          | Integrin $\beta$ 4          | BioLegend, UK  |
| FITC anti-human CD51 Antibody                           | integrin $\alpha$ V         | BioLegend, UK  |
| FITC Mouse IgG1, $\kappa$ Isotype Ctrl (FC)             | FC Control                  | BioLegend, UK  |
| FITC anti-human CD49d Antibody                          | $\alpha$ 4 integrin         | BioLegend, UK  |
| FITC anti-human CD18 Antibody                           | Integrin $\beta$ 2          | BioLegend, UK  |
| Anti-Integrin alpha 3 antibody [17C6] (FITC)            | Integrin $\alpha$ 3         | Abcam          |
| Anti-Integrin beta 3 antibody [C17] (FITC)              | Integrin $\beta$ 3          | Abcam          |

**Table S2.** *Details of the collected biopsies and derived fibroblast cultures.*

| Study number | Case or control* | Sex** | Age (years) | Ethnic Group <sup>§</sup> | Expanded cell line name |
|--------------|------------------|-------|-------------|---------------------------|-------------------------|
| 001          | 0                | 2     | 63          | 5                         | -                       |
| 003          | 0                | 1     | 75          | 10                        | C03                     |
| 005          | 0                | 1     | 77          | 2                         | -                       |
| 006          | 0                | 1     | 62          | 10                        | C06                     |
| 020          | 0                | 1     | 17          | 5                         | -                       |
| 021          | 0                | 1     | 87          | 5                         | -                       |
| 022          | 0                | 2     | 81          | 11                        | -                       |
| 024          | 0                | 1     | -           | 2                         | C24                     |
| 025          | 0                | 2     | -           | 2                         | -                       |
| 026          | 0                | 2     | 60          | 2                         | C26                     |
| 027          | 0                | 2     | -           | 2                         | -                       |
| 028          | 0                | 1     | 70          | 1                         | -                       |
| 029          | 0                | 2     | 33          | 2                         | C29                     |
| 030          | 0                | 1     | 99          | 2                         | C30                     |
| 031          | 0                | 2     | 52          | 1                         | C31                     |
| 092          | 0                | 2     | 78          | 7                         | -                       |
| 100          | 0                | 1     | 64          | 7                         | -                       |
| 103          | 0                | 1     | 86          | 2                         | C103                    |
| 110          | 0                | 2     | 62          | 2                         | C110                    |
| 111          | 0                | 2     | 70          | 2                         | C111                    |
| F-02         | 1                | 2     | 73          | 2                         | F02                     |
| F-04         | 1                | 2     | 80          | 2                         | -                       |
| F-07         | 1                | 1     | 77          | 2                         | F07                     |
| F-09         | 1                | 1     | 50          | 2                         | F09                     |
| F-10         | 1                | 2     | 72          | 2                         | F10                     |
| F-11         | 1                | 2     | 72          | 2                         | F11                     |
| F-12         | 1                | 2     | 70          | 2                         | F12                     |
| F-13         | 1                | 2     | 68          | 2                         | F13                     |
| F-14         | 1                | 2     | -           | 2                         | F14                     |
| F-15         | 1                | 2     | 79          | 2                         | -                       |
| F-23         | 1                | 2     | 58          | 1                         | -                       |
| 098          | 1                | 2     | 40          | 2                         | -                       |
| 090          | 1                | 2     | 80          | 1                         | -                       |
| 091          | 1                | 2     | 52          | 1                         | -                       |
| 093          | 1                | 2     | 77          | 2                         | -                       |
| 095          | 1                | 2     | 70          | 2                         | -                       |
| 096          | 1                | 2     | 28          | 2                         | F96                     |
| 099          | 1                | 1     | 35          | 2                         | F99                     |
| 101          | 1                | 1     | 60          | 1                         | -                       |
| 102          | 1                | 2     | 65          | 1                         | -                       |
| 104          | 1                | 1     | 70          | 2                         | -                       |
| 105          | 1                | 1     | 62          | 1                         | -                       |
| 106          | 1                | 2     | 70          | 2                         | F106                    |
| 107          | 1                | -     | -           | -                         | -                       |
| 108          | 1                | -     | -           | -                         | -                       |
| 109          | 1                | -     | -           | -                         | F109                    |

\*: 0= control and 1= case; \*\*: 1=male; 2=female; §: 1= Masai; 2= Chagga; 5 = Pare; 7= Mzigua; 10= Samba; 11= Other

**Table S3.** Differentially regulated genes (moderate *t*-test  $p < 0.05$  and  $FC > \pm 2$ ) in STF<sub>s</sub>, compared to CF<sub>s</sub>. Rawp values are generated using limma's moderate *t*-test.

| Symbol     | fold-STF_vs_CF | rawp-STF_vs_CF | Ensembl_gene    |
|------------|----------------|----------------|-----------------|
| NCAM2      | 11.73103785    | 4.62E-05       | ENSG00000154654 |
| TFAP2A     | 10.52773008    | 0.001381404    | ENSG00000137203 |
| PDE5A      | 9.119327895    | 0.014512128    | ENSG00000138735 |
| OLR1       | 6.780713474    | 0.015470846    | ENSG00000173391 |
| IL6        | 6.182493209    | 0.009692134    | ENSG00000136244 |
| LIMCH1     | 5.921673715    | 0.006130807    | ENSG00000064042 |
| TMEM176B   | 5.775186353    | 0.001015357    | ENSG00000106565 |
| NXN        | 5.751799289    | 0.004531278    | ENSG00000167693 |
| TNS3       | 5.341687675    | 0.000358491    | ENSG00000136205 |
| STMN2      | 5.325557278    | 0.021171171    | ENSG00000104435 |
| MAOA       | 4.534871486    | 0.001240538    | ENSG00000189221 |
| SMOC2      | 4.533703364    | 0.026238629    | ENSG00000112562 |
| SEMA3D     | 4.521037515    | 0.027926293    | ENSG00000153993 |
| EYA4       | 4.489393716    | 0.016403405    | ENSG00000112319 |
| TMEM176A   | 4.388787749    | 0.000598219    | ENSG00000002933 |
| TNFSF4     | 4.31466186     | 0.012499209    | ENSG00000117586 |
| BCHE       | 4.27748783     | 0.001510589    | ENSG00000114200 |
| AL354993.1 | 4.151654103    | 0.017272168    | ENSG00000227164 |
| GPR133     | 4.104915431    | 0.037620594    | ENSG00000111452 |
| PTGER3     | 4.090649705    | 0.012247946    | ENSG00000050628 |
| OXTR       | 3.900945249    | 0.033342103    | ENSG00000180914 |
| PALMD      | 3.900090226    | 0.019165553    | ENSG00000099260 |
| CLIC6      | 3.782258911    | 0.023516803    | ENSG00000159212 |
| ENTPD1     | 3.7204574      | 0.007779821    | ENSG00000138185 |
| TSHZ2      | 3.61673401     | 0.039408852    | ENSG00000182463 |
| GATA6      | 3.593801769    | 0.00634203     | ENSG00000141448 |
| DUXA       | 3.590114856    | 0.004667516    | ENSG00000258873 |
| MPP7       | 3.558329229    | 0.039179823    | ENSG00000150054 |
| KLRD1      | 3.485885059    | 0.007360197    | ENSG00000134539 |
| PAR6G      | 3.48073022     | 0.000585283    | ENSG00000178184 |
| PKP2       | 3.473141647    | 0.035593806    | ENSG00000057294 |
| AP1S3      | 3.438966352    | 0.010830412    | ENSG00000152056 |
| DMD        | 3.374604274    | 0.010098275    | ENSG00000198947 |
| CNTN1      | 3.342071272    | 0.026649684    | ENSG00000018236 |
| LUZP2      | 3.305988409    | 0.000813787    | ENSG00000187398 |
| CTSH       | 3.304182408    | 0.000435221    | ENSG00000103811 |
| LEPR       | 3.274010995    | 0.000401211    | ENSG00000116678 |
| LYPD6B     | 3.221471876    | 0.041252745    | ENSG00000150556 |
| ADARB1     | 3.206456866    | 0.006493234    | ENSG00000197381 |
| PCDHB3     | 3.178027628    | 0.002928496    | ENSG00000113205 |
| CDH8       | 3.145106237    | 0.009473557    | ENSG00000150394 |
| LRRCL15    | 3.104153714    | 0.026241295    | ENSG00000172061 |
| POLR3G     | 3.077342456    | 0.000807768    | ENSG00000113356 |
| CALCLRL    | 2.976821055    | 0.00630944     | ENSG00000064989 |

|            |             |             |                 |
|------------|-------------|-------------|-----------------|
| GGT5       | 2.976179759 | 0.005367803 | ENSG00000099998 |
| LEPREL1    | 2.972261054 | 0.015186769 | ENSG00000090530 |
| DEPTOR     | 2.924064226 | 0.006346508 | ENSG00000155792 |
| RARRES1    | 2.889785681 | 0.043547804 | ENSG00000118849 |
| RDH5       | 2.888696729 | 0.001341345 | ENSG00000135437 |
| CHST15     | 2.859987319 | 0.005943409 | ENSG00000182022 |
| PRKG2      | 2.84129647  | 0.006231375 | ENSG00000138669 |
| C10orf10   | 2.832179098 | 0.015042242 | ENSG00000165507 |
| LYPD6      | 2.81833707  | 0.014422166 | ENSG00000187123 |
| FAM107B    | 2.795652898 | 0.010379882 | ENSG00000065809 |
| KCND2      | 2.790315649 | 0.002192635 | ENSG00000184408 |
| RRAGD      | 2.766783964 | 0.004281383 | ENSG00000025039 |
| FGF1       | 2.720999139 | 0.014985931 | ENSG00000113578 |
| COL4A2     | 2.644651274 | 0.00581833  | ENSG00000134871 |
| SLC16A3    | 2.624822744 | 0.023776676 | ENSG00000141526 |
| LIPH       | 2.609554893 | 0.014754145 | ENSG00000163898 |
| RASGRF2    | 2.594611637 | 0.020097152 | ENSG00000113319 |
| CRISPLD2   | 2.57390713  | 0.020867896 | ENSG00000103196 |
| UPK1A      | 2.557020098 | 0.049508053 | ENSG00000105668 |
| HSPB8      | 2.553219374 | 0.022500189 | ENSG00000152137 |
| TFAP2A-AS1 | 2.552998164 | 0.043332356 | ENSG00000229950 |
| SPOCD1     | 2.493440021 | 0.00824046  | ENSG00000134668 |
| PMEPA1     | 2.482426925 | 0.014754014 | ENSG00000124225 |
| RNF180     | 2.466374138 | 0.005637032 | ENSG00000164197 |
| SEMA6A     | 2.461306739 | 0.042658446 | ENSG00000092421 |
| JUP        | 2.449131096 | 0.004285231 | ENSG00000173801 |
| FILIP1L    | 2.448117591 | 0.016437802 | ENSG00000168386 |
| BDH1       | 2.447154181 | 0.032145625 | ENSG00000161267 |
| SESN3      | 2.435123598 | 0.008145962 | ENSG00000149212 |
| DMRTA1     | 2.415166247 | 0.000235437 | ENSG00000176399 |
| ANKRD6     | 2.413898475 | 0.008454045 | ENSG00000135299 |
| WNT2B      | 2.397100672 | 0.00352652  | ENSG00000134245 |
| ALPL       | 2.38794151  | 0.045155748 | ENSG00000162551 |
| PCDHGA10   | 2.376424389 | 0.024457636 | ENSG00000253846 |
| MAP6       | 2.345978839 | 0.031290271 | ENSG00000171533 |
| WIPF3      | 2.345575395 | 0.010778569 | ENSG00000122574 |
| TMEM130    | 2.344286264 | 0.047202066 | ENSG00000166448 |
| ST3GAL6    | 2.340806871 | 0.010958331 | ENSG00000064225 |
| FLT1       | 2.324889396 | 0.000213086 | ENSG00000102755 |
| PCDH7      | 2.317601462 | 0.000783016 | ENSG00000169851 |
| UCHL1      | 2.316358144 | 0.00087477  | ENSG00000154277 |
| KIF20A     | 2.29717179  | 0.002719552 | ENSG00000112984 |
| ID3        | 2.288879479 | 0.001011283 | ENSG00000117318 |
| TSPAN12    | 2.281956719 | 0.001851277 | ENSG00000106025 |
| FGD4       | 2.268875585 | 0.02666006  | ENSG00000139132 |
| APBB1IP    | 2.247855946 | 0.003582197 | ENSG00000077420 |
| RASSF4     | 2.228373786 | 0.030497019 | ENSG00000107551 |
| UGT1A7     | 2.227298624 | 0.000161648 | ENSG00000244122 |



|            |              |             |                 |
|------------|--------------|-------------|-----------------|
| CCNB1      | 2.220556839  | 0.000788793 | ENSG00000134057 |
| PCDH10     | 2.200589426  | 0.017481848 | ENSG00000138650 |
| PRR5L      | 2.194670311  | 0.020981069 | ENSG00000135362 |
| EPAS1      | 2.194465174  | 0.003728483 | ENSG00000116016 |
| TLR4       | 2.192703892  | 0.022561924 | ENSG00000136869 |
| GUCY1A3    | 2.189846127  | 0.019809201 | ENSG00000164116 |
| PLXDC2     | 2.142474046  | 0.016835382 | ENSG00000120594 |
| OSGIN2     | 2.136847202  | 0.011071153 | ENSG00000164823 |
| MRVI1      | 2.134976219  | 0.0293845   | ENSG00000072952 |
| LPPR4      | 2.129216687  | 0.031200783 | ENSG00000117600 |
| SDPR       | 2.12174404   | 0.0065971   | ENSG00000168497 |
| DPM2       | 2.11405684   | 0.00959718  | ENSG00000136908 |
| DNAJC6     | 2.110174325  | 0.004672611 | ENSG00000116675 |
| PCDHB4     | 2.104890232  | 0.045291625 | ENSG00000081818 |
| TMOD1      | 2.104709081  | 0.025962297 | ENSG00000136842 |
| FBLN7      | 2.102655503  | 0.023663858 | ENSG00000144152 |
| FAM20A     | 2.090022297  | 0.031908696 | ENSG00000108950 |
| HAP1       | 2.089582906  | 0.029686781 | ENSG00000173805 |
| NCAPH      | 2.084799655  | 0.046976262 | ENSG00000121152 |
| CEP55      | 2.077852326  | 0.021860868 | ENSG00000138180 |
| SLC4A4     | 2.073165082  | 0.032932318 | ENSG00000080493 |
| TINAGL1    | 2.071448568  | 0.019801666 | ENSG00000142910 |
| PAG1       | 2.071033419  | 0.003271356 | ENSG00000076641 |
| GGH        | 2.061256438  | 0.008519441 | ENSG00000137563 |
| SULT1B1    | 2.058373801  | 0.03708697  | ENSG00000173597 |
| PCDHB2     | 2.040304057  | 0.037754186 | ENSG00000112852 |
| FAM213A    | 2.036073123  | 0.005287627 | ENSG00000122378 |
| MCOLN3     | 2.032978559  | 0.00867724  | ENSG00000055732 |
| SULF2      | 2.03209652   | 0.028371138 | ENSG00000196562 |
| PIEZO2     | 2.029576347  | 0.003481317 | ENSG00000154864 |
| PLOD2      | 2.027186204  | 0.005910056 | ENSG00000152952 |
| PLK1       | 2.020354911  | 0.015713003 | ENSG00000166851 |
| FLRT2      | 2.018536955  | 0.022351759 | ENSG00000185070 |
| SLC24A3    | 2.012010034  | 0.006938288 | ENSG00000185052 |
| KIF11      | 2.007167826  | 0.006021509 | ENSG00000138160 |
| LGR4       | 2.002136033  | 0.007188473 | ENSG00000205213 |
| PLK1S1     | -2.022300657 | 0.00013216  | ENSG00000088970 |
| KIF6       | -2.076633566 | 0.009413183 | ENSG00000164627 |
| PPL        | -2.077859528 | 0.003361394 | ENSG00000118898 |
| C1QTNF1    | -2.083382159 | 0.001865598 | ENSG00000173918 |
| HMOX1      | -2.084526915 | 0.000659409 | ENSG00000100292 |
| ST6GALNAC3 | -2.092343909 | 0.008759943 | ENSG00000184005 |
| HIST1H3E   | -2.119459282 | 0.016251148 | ENSG00000196966 |
| KCNT2      | -2.126074604 | 0.041856407 | ENSG00000162687 |
| CLEC3B     | -2.127910541 | 0.03736542  | ENSG00000163815 |
| DRP2       | -2.131968689 | 0.009578446 | ENSG00000102385 |
| PPP1R1C    | -2.180467519 | 0.00240958  | ENSG00000150722 |
| MSX1       | -2.210461336 | 0.049357291 | ENSG00000163132 |

|          |              |             |                 |
|----------|--------------|-------------|-----------------|
| NOG      | -2.264386143 | 0.035265016 | ENSG00000183691 |
| GPC6     | -2.275145403 | 0.038473033 | ENSG00000183098 |
| TIMP4    | -2.281397758 | 0.04805156  | ENSG00000157150 |
| COL21A1  | -2.305602698 | 0.019008653 | ENSG00000124749 |
| CIITA    | -2.307978845 | 0.009671071 | ENSG00000179583 |
| ATF5     | -2.327244035 | 0.004882409 | ENSG00000169136 |
| NDUFA4L2 | -2.346743234 | 0.002704909 | ENSG00000185633 |
| CA12     | -2.369762023 | 0.043816423 | ENSG00000074410 |
| CORO2B   | -2.389740488 | 0.031240666 | ENSG00000103647 |
| OLFML2A  | -2.390311684 | 0.009787756 | ENSG00000185585 |
| EBF3     | -2.406062779 | 0.015779339 | ENSG00000108001 |
| FAM129A  | -2.529731906 | 0.000440262 | ENSG00000135842 |
| SV2B     | -2.533992931 | 0.007398191 | ENSG00000185518 |
| ANKFN1   | -2.537560994 | 0.006498238 | ENSG00000153930 |
| ROBO3    | -2.548630983 | 0.005595371 | ENSG00000154134 |
| PTPRD    | -2.562021353 | 0.013103748 | ENSG00000153707 |
| COCH     | -2.654913763 | 0.007324238 | ENSG00000100473 |
| TMEM255B | -2.76460813  | 0.038999626 | ENSG00000184497 |
| IL16     | -2.894583618 | 0.04203362  | ENSG00000172349 |
| ARHGAP26 | -2.903540434 | 0.000665198 | ENSG00000145819 |
| SERPINA3 | -2.915118727 | 0.017890377 | ENSG00000196136 |
| B3GALT1  | -2.941521335 | 0.027684912 | ENSG00000172318 |
| CHI3L2   | -3.072589426 | 0.004567157 | ENSG00000064886 |
| COLEC12  | -3.089181207 | 0.010828652 | ENSG00000158270 |
| CCRL1    | -3.222281424 | 0.004033437 | ENSG00000129048 |
| TM4SF1   | -3.635311945 | 0.006795721 | ENSG00000169908 |
| IL31RA   | -3.664012372 | 0.030979677 | ENSG00000164509 |
| PAPPA2   | -3.670680383 | 0.016878892 | ENSG00000116183 |
| CPM      | -4.18300218  | 0.005003751 | ENSG00000135678 |
| THBS4    | -6.636389211 | 0.008300084 | ENSG00000113296 |
| WISP3    | -6.657278393 | 0.002054938 | ENSG00000112761 |
| SCRG1    | -7.97015897  | 0.000297917 | ENSG00000164106 |
| MYOC     | -8.213853219 | 0.034851036 | ENSG00000034971 |
| RGCC     | -9.15011579  | 0.013851614 | ENSG00000102760 |

**Table S4.** Gene ontology analysis (biological processes) of differentially expressed genes, as predicted by ORA analysis in GO-Elite (z-score > 2, Fisher's exact  $p_{\text{value}} < 0.05$ ).

| Ontology Name                                   | Z Score | Fisher Exact P | gene symbols                                                                                                                                                                                                                                                                 |
|-------------------------------------------------|---------|----------------|------------------------------------------------------------------------------------------------------------------------------------------------------------------------------------------------------------------------------------------------------------------------------|
| <b>Pro-Inflammatory</b>                         |         |                |                                                                                                                                                                                                                                                                              |
| negative regulation of cytokine secretion       | 5.61    | 0.0018         | IL-6, RGCC, TNFSF4                                                                                                                                                                                                                                                           |
| acute inflammatory response                     | 5.11    | 0.0014         | IL-6, PTGER3, SERPINA3, TNFSF4                                                                                                                                                                                                                                               |
| positive regulation of interleukin-6 production | 4.51    | 0.0051         | IL-6, TLR4, TNFSF4                                                                                                                                                                                                                                                           |
| response to antibiotic                          | 4.51    | 0.0051         | ALPL, CIITA, IL-6                                                                                                                                                                                                                                                            |
| positive regulation of inflammatory response    | 4.11    | 0.0045         | IL-6, PTGER3, TLR4, TNFSF4                                                                                                                                                                                                                                                   |
| negative regulation of leukocyte activation     | 3.82    | 0.0045         | HMOX1, IL31RA, PAG1, PDE5A, TNFSF4                                                                                                                                                                                                                                           |
| positive regulation of B cell activation        | 3.70    | 0.0117         | IL-6, TLR4, TNFSF4                                                                                                                                                                                                                                                           |
| response to lipopolysaccharide                  | 3.06    | 0.0112         | ALPL, IL-6, PTGER3, TIMP4, TLR4, TNFSF4                                                                                                                                                                                                                                      |
| positive regulation of immune effector process  | 2.83    | 0.0233         | HMOX1, IL-6, TLR4, TNFSF4                                                                                                                                                                                                                                                    |
| response to hydrogen peroxide                   | 2.72    | 0.0350         | HMOX1, IL-6, OLR1                                                                                                                                                                                                                                                            |
| immune effector process                         | 2.25    | 0.0364         | ADARB1, CTSH, IL-6, POLR3G, RGCC, TLR4, TNFSF4                                                                                                                                                                                                                               |
| regulation of angiogenesis                      | 7.51    | 1.07E-06       | COL4A2, CTSH, FGF1, FLT1, GATA6, HMOX1, IL-6, RGCC, THBS4, TSPAN12                                                                                                                                                                                                           |
| cellular response to hypoxia                    | 5.43    | 0.0005         | CCNB1, EPAS1, GATA6, HMOX1, RGCC                                                                                                                                                                                                                                             |
| angiogenesis                                    | 3.69    | 0.0033         | CALCRL, COL4A2, EPAS1, FGF1, FLT1, HMOX1, TSPAN12                                                                                                                                                                                                                            |
| <b>Pro-fibrotic</b>                             |         |                |                                                                                                                                                                                                                                                                              |
| extracellular structure organization            | 5.14    | 0.0001         | COL21A1, COL4A2, CRISPLD2, LEPREL1, OLFML2A, PCDHB2, PCDHB3, PCDHB4, PLOD2, SMOC2, SULF2, TFAP2A                                                                                                                                                                             |
| regulation of collagen biosynthetic process     | 6.38    | 0.0009         | CIITA, IL-6, RGCC                                                                                                                                                                                                                                                            |
| calcium-dependent cell-cell adhesion            | 6.10    | 0.0012         | PCDHB2, PCDHB3, PCDHB4                                                                                                                                                                                                                                                       |
| regulation of cell migration                    | 4.05    | 0.0009         | ADARB1, CTSH, FGF1, FLT1, HMOX1, IL-6, NOG, PKP2, RGCC, TFAP2A, THBS4                                                                                                                                                                                                        |
| muscle cell development                         | 3.58    | 0.0134         | CCNB1, DMD, UCHL1                                                                                                                                                                                                                                                            |
| positive regulation of locomotion               | 3.32    | 0.0063         | CTSH, FGF1, FLT1, IL16, IL-6, TFAP2A, THBS4                                                                                                                                                                                                                                  |
| microtubule-based movement                      | 3.27    | 0.0100         | HAP1, KIF11, KIF20A, KIF6, UCHL1                                                                                                                                                                                                                                             |
| extracellular region part                       | 8.79    | 2.93E-12       | ALPL, BCHE, C1QTNF1, CDH8, CEP55, CHI3L2, CLEC3B, COCH, COL21A1, COL4A2, COLEC12, CRISPLD2, CTSH, ENTPD1, FBLN7, FGF1, FLRT2, FLT1, GGH, GPC6, HMOX1, IL16, IL-6, LEPREL1, LIPH, MYOC, NOG, OLFML2A, PLOD2, SCRG1, SMOC2, SULF2, THBS4, TIMP4, TINAGL1, TNFSF4, WISP3, WNT2B |
| desmosome                                       | 6.10    | 0.0012         | JUP, PKP2, PPL                                                                                                                                                                                                                                                               |
| actin cytoskeleton                              | 3.10    | 0.0105         | CORO2B, DMD, FGD4, HAP1, JUP, SLC16A3                                                                                                                                                                                                                                        |

|                                                        |      |        |                                                                           |
|--------------------------------------------------------|------|--------|---------------------------------------------------------------------------|
| cell-substrate junction                                | 2.43 | 0.0394 | APBB1IP, ARHGAP26, DMD, TNS3                                              |
| <b>Differentiation</b>                                 |      |        |                                                                           |
| developmental induction                                | 5.61 | 0.0018 | FGF1, TFAP2A, WNT2B                                                       |
| morphogenesis of embryonic epithelium                  | 5.50 | 0.0020 | JUP, NOG, TFAP2A                                                          |
| face morphogenesis                                     | 5.50 | 0.0020 | MSX1, NOG, TFAP2A                                                         |
| nervous system development                             | 4.49 | 0.0004 | ARHGAP26, JUP, NOG, PCDHB2, PCDHB3, PCDHB4, SCRG1, SEMA3D, SEMA6A, TFAP2A |
| canonical Wnt receptor signaling pathway               | 2.88 | 0.0292 | JUP, LGR4, WNT2B                                                          |
| kidney development                                     | 2.78 | 0.0251 | CTSH, ID3, SULF2, TFAP2A                                                  |
| central nervous system development                     | 2.76 | 0.0256 | DRP2, ID3, NOG, TIMP4                                                     |
| regulation of canonical Wnt receptor signaling pathway | 2.67 | 0.0288 | ANKRD6, JUP, NOG, WNT2B                                                   |
| heart development                                      | 2.57 | 0.0276 | CALCRL, ID3, MSX1, OXTR, PKP2                                             |
| negative regulation of cell differentiation            | 2.55 | 0.0192 | ATF5, ID3, IL-6, JUP, MSX1, NOG, PKP2, TLR4, TNFSF4                       |
| neuron differentiation                                 | 2.24 | 0.0444 | ID3, MCOLN3, PTPRD, STMN2, WNT2B                                          |

**Table S5** Pathway analysis of differentially regulated genes (STFs\_vs\_CFs) based on Wikipathay and KEGG pathway databases as predicted by GO-Elite software (Fisher Extract  $p_{\text{value}} < 0.05$  and  $z_{\text{score}} > 2$ ).

| <b>Gene-Set Name</b>                                                      | <b>Percent Changed</b> | <b>Z Score</b> | <b>Fisher Exact P</b> | <b>gene symbols</b>    |
|---------------------------------------------------------------------------|------------------------|----------------|-----------------------|------------------------|
| <b>Differentiation Pathway</b><br>(WP2848)                                | 8.5106                 | 4.9519         | 0.0015                | FGF1, IL-6, NOG, WNT2B |
| <b>Malaria</b> (KEGG-hsa05144)                                            | 4.6875                 | 3.2812         | 0.0184                | IL-6, THBS4, TLR4      |
| <b>Arrhythmogenic right ventricular cardiomyopathy</b><br>(KEGG-hsa05412) | 3.4091                 | 2.5608         | 0.0418                | DMD, JUP, PKP2         |
| <b>TGF-beta signalling pathway</b><br>(KEGG-hsa04350)                     | 3.2258                 | 2.4428         | 0.0479                | ID3, NOG, THBS4        |
